# Supplementary material for: C. elegans germ granules sculpt both germline and somatic RNAome
Source: PubMed Central journal article supplement (PMC10520050; doi:10.1038/s41467-023-41556-4), 2023-09-25
Supplement: 41467_2023_41556_MOESM3_ESM.pdf [file 41467_2023_41556_MOESM3_ESM.pdf]

## **Description of Additional Supplementary Files**

**File name:** Supplementary Data 1

Description: List of strains used in this study.
